# Supplementary material for: Comparative Analysis and Characterization of Ten Complete Chloroplast Genomes of Eremurus Species (Asphodelaceae)
Source: MDPI journal article supplement (doi:10.3390/f14091709), 2023-08-24
Supplement: s1 [file s1]

**Table S5.** Individual characteristics of 85 protein-coding genes.

| No | Genes        | Nucleotid diversity<br>(Pi value) | Gene<br>length (bp),<br>after<br>alignment | Ka     | Ks     | $\omega =$<br>Ka/Ks | Gene<br>type |
|----|--------------|-----------------------------------|--------------------------------------------|--------|--------|---------------------|--------------|
| 1  | <i>psbA</i>  | 0.00178                           | 1062                                       | 0.0068 | 0.0003 | 0.037               | Reverse      |
| 2  | <i>matK</i>  | 0.00437                           | 1557                                       | 0.0072 | 0.0035 | 0.486               | Reverse      |
| 3  | <i>rps16</i> | 0.00569                           | 246                                        | 0.0153 | 0.0026 | 0.168               | Reverse      |
| 4  | <i>psbK</i>  | 0.00251                           | 186                                        | 0.0113 | 0      | 0.000               | Forward      |
| 5  | <i>psbI</i>  | 0.00541                           | 111                                        | 0.023  | 0      | 0.000               | Forward      |
| 6  | <i>atpA</i>  | 0.00182                           | 1524                                       | 0.0069 | 0.0002 | 0.025               | Reverse      |
| 7  | <i>atpF</i>  | 0.00482                           | 567                                        | 0.0165 | 0.0015 | 0.092               | Reverse      |
| 8  | <i>atpH</i>  | 0.00081                           | 246                                        | 0.003  | 0      | 0.000               | Reverse      |
| 9  | <i>atpI</i>  | 0.00054                           | 744                                        | 0.0022 | 0      | 0.000               | Reverse      |
| 10 | <i>rps2</i>  | 0.00056                           | 711                                        | 0.0025 | 0      | 0.000               | Reverse      |
| 11 | <i>rpoC2</i> | 0.00258                           | 4128                                       | 0.0058 | 0.0015 | 0.266               | Reverse      |
| 12 | <i>rpoC1</i> | 0.00137                           | 2061                                       | 0.0041 | 0.0005 | 0.127               | Reverse      |
| 13 | <i>rpoB</i>  | 0.00191                           | 3213                                       | 0.005  | 0.001  | 0.191               | Reverse      |
| 14 | <i>petN</i>  | 0.00519                           | 90                                         | 0.0226 | 0      | 0.000               | Forward      |
| 15 | <i>psbM</i>  | 0                                 | 105                                        | 0      | 0      | 0.000               | Reverse      |
| 16 | <i>psbD</i>  | 0.00082                           | 1062                                       | 0.0016 | 0.0006 | 0.360               | Forward      |
| 17 | <i>psbC</i>  | 0.00169                           | 1422                                       | 0.005  | 0.0006 | 0.125               | Forward      |
| 18 | <i>psbZ</i>  | 0                                 | 189                                        | 0      | 0      | 0.000               | Forward      |
| 19 | <i>rps14</i> | 0.00528                           | 303                                        | 0.015  | 0.0023 | 0.155               | Reverse      |
| 20 | <i>psaB</i>  | 0.00182                           | 2205                                       | 0.0076 | 0.0001 | 0.016               | Reverse      |
| 21 | <i>psaA</i>  | 0.00188                           | 2253                                       | 0.0077 | 0.0001 | 0.016               | Reverse      |
| 22 | <i>ycf3</i>  | 0                                 | 510                                        | 0      | 0      | 0.000               | Reverse      |
| 23 | <i>rps4</i>  | 0.00143                           | 606                                        | 0.0032 | 0.0009 | 0.270               | Reverse      |
| 24 | <i>ndhJ</i>  | 0.0014                            | 477                                        | 0      | 0.0018 | 0.000               | Reverse      |
| 25 | <i>ndhK</i>  | 0.00241                           | 771                                        | 0.0056 | 0.0014 | 0.254               | Reverse      |
| 26 | <i>ndhC</i>  | 0.00337                           | 363                                        | 0.0066 | 0.0024 | 0.369               | Reverse      |
| 27 | <i>atpE</i>  | 0.00165                           | 405                                        | 0.0049 | 0.0007 | 0.132               | Reverse      |
| 28 | <i>atpB</i>  | 0.0026                            | 1497                                       | 0.007  | 0.0012 | 0.165               | Reverse      |
| 29 | <i>rbcL</i>  | 0.00341                           | 1455                                       | 0.0071 | 0.0023 | 0.316               | Forward      |

|    |              |         |      |        |        |       |         |
|----|--------------|---------|------|--------|--------|-------|---------|
| 30 | <i>accD</i>  | 0.00287 | 1482 | 0.0034 | 0.0028 | 0.824 | Forward |
| 31 | <i>psaI</i>  | 0.0032  | 111  | 0.0139 | 0      | 0.000 | Forward |
| 32 | <i>ycf4</i>  | 0.00156 | 555  | 0.0016 | 0.0016 | 0.981 | Forward |
| 33 | <i>cemA</i>  | 0.00177 | 690  | 0.0038 | 0.0012 | 0.329 | Forward |
| 34 | <i>petA</i>  | 0.0018  | 963  | 0.0056 | 0.0006 | 0.115 | Forward |
| 35 | <i>psbJ</i>  | 0.00379 | 123  | 0      | 0.0054 | 0.000 | Reverse |
| 36 | <i>psbL</i>  | 0       | 117  | 0      | 0      | 0.000 | Reverse |
| 37 | <i>psbF</i>  | 0.00389 | 120  | 0      | 0.0054 | 0.000 | Reverse |
| 38 | <i>psbE</i>  | 0       | 252  | 0      | 0      | 0.000 | Reverse |
| 39 | <i>petL</i>  | 0       | 96   | 0      | 0      | 0.000 | Forward |
| 40 | <i>petG</i>  | 0       | 114  | 0      | 0      | 0.000 | Forward |
| 41 | <i>psaJ</i>  | 0       | 129  | 0      | 0      | 0.000 | Forward |
| 42 | <i>rpl33</i> | 0       | 201  | 0      | 0      | 0.000 | Forward |
| 43 | <i>rps18</i> | 0.00065 | 306  | 0      | 0.0009 | 0.000 | Forward |
| 44 | <i>rpl20</i> | 0.00113 | 354  | 0      | 0.0015 | 0.000 | Reverse |
| 45 | <i>rps12</i> | 0       | 372  | 0      | 0      | 0.000 | Reverse |
| 46 | <i>rps12</i> | 0       | 372  | 0      | 0      | 0.000 | Mixed   |
| 47 | <i>clpP</i>  | 0.0009  | 615  | 0.0039 | 0      | 0.000 | Reverse |
| 48 | <i>psbB</i>  | 0.00188 | 1527 | 0.0073 | 0.0002 | 0.023 | Forward |
| 49 | <i>psbT</i>  | 0.0037  | 102  | 0.0159 | 0      | 0.000 | Forward |
| 50 | <i>psbN</i>  | 0       | 132  | 0      | 0      | 0.000 | Reverse |
| 51 | <i>psbH</i>  | 0.0033  | 222  | 0      | 0.0044 | 0.000 | Forward |
| 52 | <i>petB</i>  | 0       | 657  | 0      | 0      | 0.000 | Forward |
| 53 | <i>petD</i>  | 0.00162 | 534  | 0.0066 | 0      | 0.000 | Forward |
| 54 | <i>rpoA</i>  | 0.00251 | 1020 | 0.007  | 0.0012 | 0.173 | Reverse |
| 55 | <i>rps11</i> | 0.00368 | 417  | 0.0141 | 0      | 0.000 | Reverse |
| 56 | <i>rpl36</i> | 0.00585 | 114  | 0.025  | 0      | 0.000 | Reverse |
| 57 | <i>rps8</i>  | 0       | 399  | 0      | 0      | 0.000 | Reverse |
| 58 | <i>rpl14</i> | 0.00054 | 369  | 0.0023 | 0      | 0.000 | Reverse |
| 59 | <i>rpl16</i> | 0.00254 | 420  | 0.0063 | 0.0013 | 0.205 | Reverse |
| 60 | <i>rps3</i>  | 0.00259 | 651  | 0.007  | 0.0013 | 0.188 | Reverse |
| 61 | <i>rpl22</i> | 0.00322 | 393  | 0.0044 | 0.0022 | 0.509 | Reverse |
| 62 | <i>rps19</i> | 0.00536 | 225  | 0.0041 | 0.0058 | 1.423 | Reverse |

|    |              |         |      |        |        |       |         |
|----|--------------|---------|------|--------|--------|-------|---------|
| 63 | <i>rpl2</i>  | 0.00026 | 759  | 0.0011 | 0      | 0.000 | Reverse |
| 64 | <i>rpl23</i> | 0       | 282  | 0      | 0      | 0.000 | Reverse |
| 65 | <i>ycf2</i>  | 0.00102 | 6855 | 0.0016 | 0.0009 | 0.531 | Forward |
| 66 | <i>ndhB</i>  | 0.00057 | 1533 | 0.0005 | 0.0006 | 1.074 | Reverse |
| 67 | <i>rps7</i>  | 0.00043 | 468  | 0.0018 | 0      | 0.000 | Reverse |
| 68 | <i>ycf1</i>  | 0.00121 | 1268 | 0.0014 | 0.0012 | 0.817 | Forward |
| 69 | <i>ndhF</i>  | 0.00513 | 2226 | 0.0111 | 0.0033 | 0.296 | Reverse |
| 70 | <i>ccsA</i>  | 0.00352 | 972  | 0.0044 | 0.0033 | 0.744 | Forward |
| 71 | <i>ndhD</i>  | 0.00433 | 1503 | 0.0155 | 0.0009 | 0.056 | Reverse |
| 72 | <i>psaC</i>  | 0.00163 | 246  | 0.0071 | 0      | 0.000 | Reverse |
| 73 | <i>ndhE</i>  | 0.00196 | 306  | 0.0087 | 0      | 0.000 | Reverse |
| 74 | <i>ndhG</i>  | 0.0036  | 531  | 0.0113 | 0.001  | 0.090 | Reverse |
| 75 | <i>ndhI</i>  | 0.00037 | 543  | 0.0017 | 0      | 0.000 | Reverse |
| 76 | <i>ndhA</i>  | 0.00317 | 1092 | 0.0056 | 0.0024 | 0.421 | Reverse |
| 77 | <i>ndhH</i>  | 0.00186 | 1182 | 0.0067 | 0.0004 | 0.065 | Reverse |
| 78 | <i>rps15</i> | 0.00626 | 270  | 0.0078 | 0.0059 | 0.762 | Reverse |
| 79 | <i>ycf1</i>  | 0.00961 | 5727 | 0.0087 | 0.0099 | 1.128 | Reverse |
| 80 | <i>rps7</i>  | 0.00043 | 468  | 0.0018 | 0      | 0.000 | Forward |
| 81 | <i>ndhB</i>  | 0.00057 | 1533 | 0.0005 | 0.0006 | 1.074 | Forward |
| 82 | <i>ycf2</i>  | 0.00102 | 6855 | 0.0016 | 0.0009 | 0.531 | Reverse |
| 83 | <i>rpl23</i> | 0       | 282  | 0      | 0      | 0.000 | Forward |
| 84 | <i>rpl2</i>  | 0.00026 | 759  | 0.0011 | 0      | 0.000 | Forward |
| 85 | <i>rps19</i> | 0.00167 | 279  | 0.0074 | 0      | 0.000 | Forward |
