# Supplementary material for: Comparative Analysis and Characterization of Ten Complete Chloroplast Genomes of Eremurus Species (Asphodelaceae)
Source: MDPI journal article supplement (doi:10.3390/f14091709), 2023-08-24
Supplement: s1 [file s1]

**Table S4.** Unique Simple sequence repeats (SSRs) in the chloroplast genome (cpDNA) of 10 *Eremurus* species.

| SSRs                  | AATT | ATCC | AAACT | AAATT | ATATC | AAAAAT | AAATTC | AAATTG |
|-----------------------|------|------|-------|-------|-------|--------|--------|--------|
| <i>E. inderiensis</i> | 0    | 0    | 0     | 0     | 0     | 0      | 0      | 0      |
| <i>E. hissaricus</i>  | 0    | 0    | 1     | 0     | 0     | 0      | 1      | 0      |
| <i>E. iae</i>         | 0    | 0    | 0     | 0     | 0     | 0      | 0      | 0      |
| <i>E. regelii</i>     | 0    | 0    | 0     | 0     | 0     | 0      | 0      | 0      |
| <i>E. soogdianus</i>  | 0    | 0    | 0     | 0     | 0     | 0      | 0      | 0      |
| <i>E. aitchisonii</i> | 0    | 0    | 0     | 0     | 0     | 0      | 0      | 1      |
| <i>E. albertii</i>    | 0    | 0    | 0     | 0     | 0     | 0      | 0      | 0      |
| <i>E. lactiflorus</i> | 0    | 1    | 0     | 1     | 1     | 0      | 0      | 0      |
| <i>E. luteus</i>      | 0    | 0    | 0     | 0     | 0     | 0      | 0      | 0      |
| <i>E. suworowii</i>   | 1    | 0    | 0     | 0     | 0     | 1      | 0      | 0      |
