# Supplementary material for: Comparative Analysis and Characterization of Ten Complete Chloroplast Genomes of Eremurus Species (Asphodelaceae)
Source: MDPI journal article supplement (doi:10.3390/f14091709), 2023-08-24
Supplement: s1 [file s1]

**Table S3.** Common Simple sequence repeats (SSRs) in the chloroplast genome (cpDNA) of 10 *Eremurus* species.

| SSRs                  | A  | AG | AT | AAT | AAAC | AAAT | AATG |
|-----------------------|----|----|----|-----|------|------|------|
| <i>E. andersonii</i>  | 59 | 3  | 7  | 1   | 1    | 1    | 1    |
| <i>E. hissaricus</i>  | 61 | 3  | 9  | 1   | 1    | 1    | 1    |
| <i>E. iae</i>         | 61 | 3  | 8  | 1   | 1    | 1    | 1    |
| <i>E. regelii</i>     | 58 | 3  | 8  | 1   | 1    | 1    | 1    |
| <i>E. soogdianus</i>  | 61 | 3  | 7  | 1   | 1    | 1    | 1    |
| <i>E. aitchisonii</i> | 73 | 3  | 8  | 1   | 1    | 3    | 1    |
| <i>E. albertii</i>    | 59 | 3  | 7  | 2   | 1    | 1    | 1    |
| <i>E. lactiflorus</i> | 56 | 3  | 7  | 1   | 1    | 1    | 1    |
| <i>E. luteus</i>      | 68 | 3  | 9  | 1   | 2    | 3    | 1    |
| <i>E. suworowii</i>   | 67 | 3  | 8  | 1   | 1    | 3    | 1    |
