# Supplementary material for: Comparative Analysis and Characterization of Ten Complete Chloroplast Genomes of Eremurus Species (Asphodelaceae)
Source: MDPI journal article supplement (doi:10.3390/f14091709), 2023-08-24
Supplement: s1 [file s1]

**Table S1.** Information on sampling localities and voucher specimens of ten newly sequenced *Eremurus* species.

| №  | Species                     | Sampling locality, Altitude, Latitude, Longitude, Collected date, Collector                                                      | General distribution and endemism                                                                                                                                                                                          | Voucher     |
|----|-----------------------------|----------------------------------------------------------------------------------------------------------------------------------|----------------------------------------------------------------------------------------------------------------------------------------------------------------------------------------------------------------------------|-------------|
| 1  | <i>Eremurus inderiensis</i> | Near Bukhara-Khorezm high road, Khorezm, Uzbekistan, h=161 m, N 41.068596 E 61.974243, 03.05.2019, D. Abdullaev, D. Makhmudjanov | Central Asia (Kazakhstan; Kyrgyzstan, Tajikistan, Turkmenistan, Uzbekistan): Northern and Southern deserts, Southern Pamir-Alay, Western Kopet-Dag; Afghanistan, East European Russia, Iran, Pakistan, West Siberia, China | ZD0742(KUN) |
| 2  | <i>Eremurus hissaricus</i>  | Takhtakaracha, Samarkand, Uzbekistan, h=1276 m, N 39.185091 E 66.577403, 27.05.2017, D. Abdullaev, A. Uralov                     | Endemic to Central Asia (Uzbekistan and Tajikistan): Pamir Alay, Hissar range                                                                                                                                              | DD11(TASH)  |
| 3  | <i>Eremurus iae</i>         | Vakhshivar, Denou, Surkhandrya, Uzbekistan, h=2007 m, N 38.354355 E 67.597321, 02.06.2019, D. Makhmudjanov, I. Juramurodov       | Endemic to Central Asia (Uzbekistan and Tajikistan): Pamir Alay, Hissar range                                                                                                                                              | ID093(KUN)  |
| 4  | <i>Eremurus regelii</i>     | Kumushkon, Tashkent, Uzbekistan, h=1695 m, N 41.213893 E 69.491614, 10.06.2017, D. Abdullaev, A. Uralov                          | Central Asia (Kazakhstan, Kyrgyzstan, Tajikistan, Uzbekistan): Pamir-Alay, Tien Shan; North Afghanistan                                                                                                                    | DD09(TASH)  |
| 5  | <i>Eremurus soogdianus</i>  | Majrum, Nurata, Uzbekistan, h=717 m, N 40.577037, E 66.721646, 30.05.2016, D. Abdullaev, A. Uralov                               | Central Asia (Kazakhstan, Kyrgyzstan, Tajikistan, Uzbekistan): Pamir-Alay, Tien Shan; North Afghanistan                                                                                                                    | DD13(TASH)  |
| 6  | <i>Eremurus aitchisonii</i> | Surkhadarya, Uzbekistan, h=1532 m, N 38.240486 E 67.094156, 20.05.2016, D. Abdullaev                                             | Central Asia (Kyrgyzstan, Tajikistan, Uzbekistan): Tien Shan, Pamir-Alay; Afghanistan, Pakistan,                                                                                                                           | DD02(TASH)  |
| 7  | <i>Eremurus alberti</i>     | Babatag, Chagam, Surkhadarya, Uzbekistan, h=901 m, N 38.161604 E 68.10252, 29.03.2019, D. Makhmudjanov                           | Central Asia (Kyrgyzstan, Tajikistan, Uzbekistan): Pamir-Alay; North Afghanistan                                                                                                                                           | DD03(TASH)  |
| 8  | <i>Eremurus lactiflorus</i> | Hayatsay, Nurata, Uzbekistan, h=1137 m, N 40.331377 E 66.434497, 30.05.2016, D. Abdullaev, A. Uralov                             | Endemic to Central Asia: (Kazakhstan; Kyrgyzstan; Uzbekistan): Tien Shan                                                                                                                                                   | DD07(TASH)  |
| 9  | <i>Eremurus luteus</i>      | Aktash, Sherobod, Surkhadarya, Uzbekistan, h=526 m, N 37.353780 E 66.473808, 10.03.2016, K. Tojibaev, M. Turginov                | Central Asia: (Tajikistan, Turkmenistan, Uzbekistan); Afghanistan, Iran                                                                                                                                                    | DD01(TASH)  |
| 10 | <i>Eremurus suworowii</i>   | Babatag, Akmachit, Surkhadarya, Uzbekistan, h=1000 m, N 38.070680 E 68.133095, 20.04.2017, D. Abdullaev, A. Uralov               | Central Asia: (Tajikistan, Uzbekistan) Pamir-Alay; North Afghanistan                                                                                                                                                       | DD04(TASH)  |
