# Supplementary material for: Comparative Analysis and Characterization of Ten Complete Chloroplast Genomes of Eremurus Species (Asphodelaceae)
Source: MDPI journal article supplement (doi:10.3390/f14091709), 2023-08-24
Supplement: s1 [file s1]

**Table S2.** Location and length of intron-containing genes in ten *Eremurus* species.

| <i>Eremurus inderiensis</i> |        |        |       |         |        |          |         |
|-----------------------------|--------|--------|-------|---------|--------|----------|---------|
| Gene                        | Start  | End    | ExonI | IntronI | ExonII | IntronII | ExonIII |
| <i>trnK-UUU</i>             | 1346   | 4032   | 35    | 2615    | 37     |          |         |
| <i>rps16</i>                | 4479   | 5616   | 207   | 892     | 39     |          |         |
| <i>trnG-UCC</i>             | 8574   | 9332   | 23    | 687     | 49     |          |         |
| <i>atpF</i>                 | 11245  | 12576  | 408   | 765     | 159    |          |         |
| <i>rpoC1</i>                | 20084  | 22880  | 1626  | 736     | 435    |          |         |
| <i>trnL-UAA</i>             | 46633  | 47220  | 37    | 501     | 50     |          |         |
| <i>trnV-UAC</i>             | 51469  | 52134  | 37    | 590     | 39     |          |         |
| <i>rps12(1)</i>             | 69973  | 98927  | 114   | 28583   | 258    |          |         |
| <i>rps12(2)</i>             | 69973  | 139944 | 114   | 69600   | 258    |          |         |
| <i>petB</i>                 | 75243  | 76686  | 6     | 787     | 651    |          |         |
| <i>petD</i>                 | 76925  | 78143  | 9     | 685     | 525    |          |         |
| <i>rpl16</i>                | 81725  | 83059  | 411   | 915     | 9      |          |         |
| <i>rpl2(1)</i>              | 84942  | 86364  | 432   | 664     | 327    |          |         |
| <i>rpl2(2)</i>              | 152250 | 153672 | 327   | 664     | 432    |          |         |
| <i>ndhB(1)</i>              | 95597  | 97828  | 756   | 699     | 777    |          |         |
| <i>ndhB(2)</i>              | 140786 | 143017 | 777   | 699     | 756    |          |         |
| <i>trnI-GAU(1)</i>          | 102856 | 103869 | 42    | 937     | 35     |          |         |
| <i>trnI-GAU(2)</i>          | 134745 | 135758 | 35    | 937     | 42     |          |         |
| <i>trnA-UGC(1)</i>          | 103934 | 104812 | 38    | 806     | 35     |          |         |
| <i>trnA-UGC(2)</i>          | 133802 | 134680 | 35    | 806     | 38     |          |         |
| <i>ndhA</i>                 | 119488 | 121653 | 540   | 1074    | 552    |          |         |
| <i>ycf3</i>                 | 41692  | 43690  | 153   | 763     | 228    | 726      | 129     |
| <i>clpP</i>                 | 70215  | 72302  | 252   | 662     | 294    | 811      | 69      |
| <i>Eremurus hissaricus</i>  |        |        |       |         |        |          |         |
| Gene                        | Start  | End    | ExonI | IntronI | ExonII | IntronII | ExonIII |
| <i>trnK-UUU</i>             | 1492   | 4178   | 35    | 2615    | 37     |          |         |
| <i>rps16</i>                | 4622   | 5757   | 207   | 890     | 39     |          |         |
| <i>trnG-UCC</i>             | 8675   | 9433   | 23    | 687     | 49     |          |         |
| <i>atpF</i>                 | 11346  | 12677  | 408   | 765     | 159    |          |         |
| <i>rpoC1</i>                | 20187  | 22986  | 1626  | 739     | 435    |          |         |
| <i>trnL-UAA</i>             | 46809  | 47403  | 37    | 501     | 57     |          |         |
| <i>trnV-UAC</i>             | 51699  | 52364  | 37    | 590     | 39     |          |         |
| <i>rps12(1)</i>             | 70226  | 99046  | 114   | 28449   | 258    |          |         |
| <i>rps12(2)</i>             | 70226  | 140085 | 114   | 69488   | 258    |          |         |
| <i>petB</i>                 | 75468  | 76915  | 6     | 791     | 651    |          |         |
| <i>petD</i>                 | 77154  | 78380  | 9     | 693     | 525    |          |         |

|                                |              |            |              |                |               |                 |                |
|--------------------------------|--------------|------------|--------------|----------------|---------------|-----------------|----------------|
| <i>rpl16</i>                   | 81953        | 83287      | 411          | 915            | 9             |                 |                |
| <i>rpl2(1)</i>                 | 85073        | 86495      | 432          | 664            | 327           |                 |                |
| <i>rpl2(2)</i>                 | 152379       | 153801     | 327          | 664            | 432           |                 |                |
| <i>ndhB(1)</i>                 | 95716        | 97947      | 756          | 699            | 777           |                 |                |
| <i>ndhB(2)</i>                 | 140927       | 143158     | 777          | 699            | 756           |                 |                |
| <i>trnI-GAU(1)</i>             | 102975       | 103988     | 42           | 937            | 35            |                 |                |
| <i>trnI-GAU(2)</i>             | 134886       | 135899     | 35           | 937            | 42            |                 |                |
| <i>trnA-UGC(1)</i>             | 104053       | 104931     | 38           | 806            | 35            |                 |                |
| <i>trnA-UGC(2)</i>             | 133943       | 134821     | 35           | 806            | 38            |                 |                |
| <i>ndhA</i>                    | 119568       | 121735     | 540          | 1076           | 552           |                 |                |
| <i>ycf3</i>                    | 41831        | 43829      | 153          | 763            | 228           | 726             | 129            |
| <i>clpP</i>                    | 70468        | 72533      | 252          | 645            | 294           | 806             | 69             |
| <b><i>Eremurus iae</i></b>     |              |            |              |                |               |                 |                |
| <b>Gene</b>                    | <b>Start</b> | <b>End</b> | <b>ExonI</b> | <b>IntronI</b> | <b>ExonII</b> | <b>IntronII</b> | <b>ExonIII</b> |
| <i>trnK-UUU</i>                | 1368         | 4054       | 35           | 2615           | 37            |                 |                |
| <i>rps16</i>                   | 4492         | 5625       | 207          | 888            | 39            |                 |                |
| <i>trnG-UCC</i>                | 8529         | 9287       | 23           | 687            | 49            |                 |                |
| <i>atpF</i>                    | 11200        | 12532      | 408          | 766            | 159           |                 |                |
| <i>rpoC1</i>                   | 20036        | 22839      | 1626         | 743            | 435           |                 |                |
| <i>trnL-UAA</i>                | 46687        | 47281      | 37           | 501            | 57            |                 |                |
| <i>trnV-UAC</i>                | 51685        | 52350      | 37           | 590            | 39            |                 |                |
| <i>rps12(1)</i>                | 70218        | 99138      | 114          | 28549          | 258           |                 |                |
| <i>rps12(2)</i>                | 70218        | 140470     | 114          | 69881          | 258           |                 |                |
| <i>petB</i>                    | 75460        | 76907      | 6            | 791            | 651           |                 |                |
| <i>petD</i>                    | 77146        | 78372      | 9            | 693            | 525           |                 |                |
| <i>rpl16</i>                   | 81946        | 83280      | 411          | 915            | 9             |                 |                |
| <i>rpl2(1)</i>                 | 85165        | 86587      | 432          | 664            | 327           |                 |                |
| <i>rpl2(2)</i>                 | 152764       | 154186     | 327          | 664            | 432           |                 |                |
| <i>ndhB(1)</i>                 | 95808        | 98039      | 756          | 699            | 777           |                 |                |
| <i>ndhB(2)</i>                 | 141312       | 143543     | 777          | 699            | 756           |                 |                |
| <i>trnI-GAU(1)</i>             | 103067       | 104080     | 42           | 937            | 35            |                 |                |
| <i>trnI-GAU(2)</i>             | 135271       | 136284     | 35           | 937            | 42            |                 |                |
| <i>trnA-UGC(1)</i>             | 104145       | 105023     | 38           | 806            | 35            |                 |                |
| <i>trnA-UGC(2)</i>             | 134328       | 135206     | 35           | 806            | 38            |                 |                |
| <i>ndhA</i>                    | 119655       | 121815     | 540          | 1069           | 552           |                 |                |
| <i>ycf3</i>                    | 41682        | 43680      | 153          | 763            | 228           | 726             | 129            |
| <i>clpP</i>                    | 70460        | 72525      | 252          | 645            | 294           | 806             | 69             |
| <b><i>Eremurus regelii</i></b> |              |            |              |                |               |                 |                |
| <b>Gene</b>                    | <b>Start</b> | <b>End</b> | <b>ExonI</b> | <b>IntronI</b> | <b>ExonII</b> | <b>IntronII</b> | <b>ExonIII</b> |
| <i>trnK-UUU</i>                | 1368         | 4054       | 35           | 2615           | 37            |                 |                |

| <i>rps16</i>                      | 4492   | 5627   | 207   | 890     | 39     |          |         |
|-----------------------------------|--------|--------|-------|---------|--------|----------|---------|
| <i>trnG-UCC</i>                   | 8536   | 9294   | 23    | 687     | 49     |          |         |
| <i>atpF</i>                       | 11207  | 12538  | 408   | 766     | 159    |          |         |
| <i>rpoC1</i>                      | 20042  | 22846  | 1626  | 744     | 435    |          |         |
| <i>trnL-UAA</i>                   | 46609  | 47203  | 37    | 501     | 57     |          |         |
| <i>trnV-UAC</i>                   | 51479  | 52144  | 37    | 590     | 39     |          |         |
| <i>rps12(1)</i>                   | 70012  | 98931  | 114   | 28548   | 258    |          |         |
| <i>rps12(2)</i>                   | 70012  | 140113 | 114   | 69730   | 258    |          |         |
| <i>petB</i>                       | 75254  | 76700  | 6     | 790     | 651    |          |         |
| <i>petD</i>                       | 76939  | 78165  | 9     | 693     | 525    |          |         |
| <i>rpl16</i>                      | 81739  | 83073  | 411   | 915     | 9      |          |         |
| <i>rpl2(1)</i>                    | 84958  | 86380  | 432   | 664     | 327    |          |         |
| <i>rpl2(2)</i>                    | 152407 | 153829 | 327   | 664     | 432    |          |         |
| <i>ndhB(1)</i>                    | 95601  | 97832  | 756   | 699     | 777    |          |         |
| <i>ndhB(2)</i>                    | 140955 | 143186 | 777   | 699     | 756    |          |         |
| <i>trnI-GAU(1)</i>                | 102860 | 103873 | 42    | 937     | 35     |          |         |
| <i>trnI-GAU(2)</i>                | 134914 | 135927 | 35    | 937     | 42     |          |         |
| <i>trnA-UGC(1)</i>                | 103938 | 104816 | 38    | 806     | 35     |          |         |
| <i>trnA-UGC(2)</i>                | 133971 | 134849 | 35    | 806     | 38     |          |         |
| <i>ndhA</i>                       | 119601 | 121762 | 540   | 1070    | 552    |          |         |
| <i>ycf3</i>                       | 41683  | 43681  | 153   | 763     | 228    | 726      | 129     |
| <i>clpP</i>                       | 70254  | 72319  | 252   | 645     | 294    | 806      | 69      |
| <b><i>Eremurus soogdianus</i></b> |        |        |       |         |        |          |         |
| Gene                              | Start  | End    | ExonI | IntronI | ExonII | IntronII | ExonIII |
| <i>trnK-UUU</i>                   | 1396   | 4082   | 35    | 2615    | 37     |          |         |
| <i>rps16</i>                      | 4529   | 5665   | 207   | 891     | 39     |          |         |
| <i>trnG-UCC</i>                   | 8618   | 9376   | 23    | 687     | 49     |          |         |
| <i>atpF</i>                       | 11289  | 12620  | 408   | 765     | 159    |          |         |
| <i>rpoC1</i>                      | 20127  | 22923  | 1626  | 736     | 435    |          |         |
| <i>trnL-UAA</i>                   | 46678  | 47265  | 37    | 501     | 50     |          |         |
| <i>trnV-UAC</i>                   | 51514  | 52179  | 37    | 590     | 39     |          |         |
| <i>rps12(1)</i>                   | 70018  | 98974  | 114   | 28585   | 258    |          |         |
| <i>rps12(2)</i>                   | 70018  | 139985 | 114   | 69596   | 258    |          |         |
| <i>petB</i>                       | 75289  | 76732  | 6     | 787     | 651    |          |         |
| <i>petD</i>                       | 76971  | 78189  | 9     | 685     | 525    |          |         |
| <i>rpl16</i>                      | 81772  | 83106  | 411   | 915     | 9      |          |         |
| <i>rpl2(1)</i>                    | 84989  | 86411  | 432   | 664     | 327    |          |         |
| <i>rpl2(2)</i>                    | 152291 | 153713 | 327   | 664     | 432    |          |         |
| <i>ndhB(1)</i>                    | 95644  | 97875  | 756   | 699     | 777    |          |         |
| <i>ndhB(2)</i>                    | 140827 | 143058 | 777   | 699     | 756    |          |         |
| <i>trnI-GAU(1)</i>                | 102903 | 103916 | 42    | 937     | 35     |          |         |

| <i>trnI-GAU(2)</i>                 | 134786 | 135799 | 35    | 937     | 42     |          |         |
|------------------------------------|--------|--------|-------|---------|--------|----------|---------|
| <i>trnA-UGC(1)</i>                 | 103981 | 104859 | 38    | 806     | 35     |          |         |
| <i>trnA-UGC(2)</i>                 | 133843 | 134721 | 35    | 806     | 38     |          |         |
| <i>ndhA</i>                        | 119529 | 121694 | 540   | 1074    | 552    |          |         |
| <i>ycf3</i>                        | 41736  | 43734  | 153   | 763     | 228    | 726      | 129     |
| <i>clpP</i>                        | 70260  | 72347  | 252   | 663     | 294    | 810      | 69      |
| <b><i>Eremurus aitchisonii</i></b> |        |        |       |         |        |          |         |
| Gene                               | Start  | End    | ExonI | IntronI | ExonII | IntronII | ExonIII |
| <i>trnK-UUU</i>                    | 1368   | 4053   | 35    | 2614    | 37     |          |         |
| <i>rps16</i>                       | 4484   | 5617   | 207   | 888     | 39     |          |         |
| <i>trnG-UCC</i>                    | 8803   | 9561   | 23    | 687     | 49     |          |         |
| <i>atpF</i>                        | 11473  | 12839  | 408   | 800     | 159    |          |         |
| <i>rpoC1</i>                       | 20348  | 23146  | 1626  | 738     | 435    |          |         |
| <i>trnL-UAA</i>                    | 46851  | 47439  | 37    | 502     | 50     |          |         |
| <i>trnV-UAC</i>                    | 51699  | 52364  | 37    | 590     | 39     |          |         |
| <i>rps12(1)</i>                    | 70177  | 99110  | 114   | 28562   | 258    |          |         |
| <i>rps12(2)</i>                    | 70177  | 141166 | 114   | 70588   | 258    |          |         |
| <i>petB</i>                        | 75423  | 76866  | 6     | 787     | 651    |          |         |
| <i>petD</i>                        | 77110  | 78328  | 9     | 685     | 525    |          |         |
| <i>rpl16</i>                       | 81901  | 83234  | 411   | 914     | 9      |          |         |
| <i>rpl2(1)</i>                     | 85137  | 86559  | 432   | 664     | 327    |          |         |
| <i>rpl2(2)</i>                     | 153460 | 154882 | 327   | 664     | 432    |          |         |
| <i>ndhB(1)</i>                     | 95780  | 98011  | 756   | 699     | 777    |          |         |
| <i>ndhB(2)</i>                     | 142008 | 144239 | 777   | 699     | 756    |          |         |
| <i>trnI-GAU(1)</i>                 | 103036 | 104049 | 42    | 937     | 35     |          |         |
| <i>trnI-GAU(2)</i>                 | 135970 | 136983 | 35    | 937     | 42     |          |         |
| <i>trnA-UGC(1)</i>                 | 104114 | 104992 | 38    | 806     | 35     |          |         |
| <i>trnA-UGC(2)</i>                 | 135027 | 135905 | 35    | 806     | 38     |          |         |
| <i>ndhA</i>                        | 120339 | 122552 | 540   | 1062    | 552    |          |         |
| <i>ycf3</i>                        | 41987  | 43983  | 153   | 757     | 228    | 730      | 129     |
| <i>clpP</i>                        | 70417  | 72501  | 252   | 660     | 294    | 810      | 69      |
| <b><i>Eremurus albertii</i></b>    |        |        |       |         |        |          |         |
| Gene                               | Start  | End    | ExonI | IntronI | ExonII | IntronII | ExonIII |
| <i>trnK-UUU</i>                    | 1370   | 4054   | 35    | 2613    | 37     |          |         |
| <i>rps16</i>                       | 4487   | 5620   | 207   | 888     | 39     |          |         |
| <i>trnG-UCC</i>                    | 8501   | 9259   | 23    | 687     | 49     |          |         |
| <i>atpF</i>                        | 11174  | 12504  | 408   | 764     | 159    |          |         |
| <i>rpoC1</i>                       | 20014  | 22811  | 1626  | 737     | 435    |          |         |
| <i>trnL-UAA</i>                    | 46526  | 47113  | 37    | 501     | 50     |          |         |
| <i>trnV-UAC</i>                    | 51418  | 52083  | 37    | 590     | 39     |          |         |
| <i>rps12(1)</i>                    | 69869  | 98795  | 114   | 28555   | 258    |          |         |

|                                    |              |            |              |                |               |                 |                |
|------------------------------------|--------------|------------|--------------|----------------|---------------|-----------------|----------------|
| <i>rps12(2)</i>                    | 69869        | 139809     | 114          | 69539          | 258           |                 |                |
| <i>petB</i>                        | 75110        | 76560      | 6            | 794            | 651           |                 |                |
| <i>petD</i>                        | 76799        | 78017      | 9            | 685            | 525           |                 |                |
| <i>rpl16</i>                       | 81584        | 82922      | 411          | 919            | 9             |                 |                |
| <i>rpl2(1)</i>                     | 84822        | 86244      | 432          | 664            | 327           |                 |                |
| <i>rpl2(2)</i>                     | 152103       | 153525     | 327          | 664            | 432           |                 |                |
| <i>ndhB(1)</i>                     | 95465        | 97696      | 756          | 699            | 777           |                 |                |
| <i>ndhB(2)</i>                     | 140651       | 142882     | 777          | 699            | 756           |                 |                |
| <i>trnI-GAU(1)</i>                 | 102713       | 103726     | 42           | 937            | 35            |                 |                |
| <i>trnI-GAU(2)</i>                 | 134621       | 135634     | 35           | 937            | 42            |                 |                |
| <i>trnA-UGC(1)</i>                 | 103791       | 104669     | 38           | 806            | 35            |                 |                |
| <i>trnA-UGC(2)</i>                 | 133678       | 134556     | 35           | 806            | 38            |                 |                |
| <i>ndhA</i>                        | 119303       | 121464     | 540          | 1070           | 552           |                 |                |
| <i>ycf3</i>                        | 41633        | 43623      | 153          | 755            | 228           | 726             | 129            |
| <i>clpP</i>                        | 70109        | 72189      | 252          | 663            | 294           | 803             | 69             |
| <b><i>Eremurus lactiflorus</i></b> |              |            |              |                |               |                 |                |
| <b>Gene</b>                        | <b>Start</b> | <b>End</b> | <b>ExonI</b> | <b>IntronI</b> | <b>ExonII</b> | <b>IntronII</b> | <b>ExonIII</b> |
| <i>trnK-UUU</i>                    | 1370         | 4054       | 35           | 2613           | 37            |                 |                |
| <i>rps16</i>                       | 4494         | 5628       | 207          | 889            | 39            |                 |                |
| <i>trnG-UCC</i>                    | 8565         | 9323       | 23           | 687            | 49            |                 |                |
| <i>atpF</i>                        | 11235        | 12568      | 408          | 767            | 159           |                 |                |
| <i>rpoC1</i>                       | 20072        | 22873      | 1626         | 741            | 435           |                 |                |
| <i>trnL-UAA</i>                    | 46641        | 47228      | 37           | 501            | 50            |                 |                |
| <i>trnV-UAC</i>                    | 51137        | 51802      | 37           | 590            | 39            |                 |                |
| <i>rps12(1)</i>                    | 69645        | 98456      | 114          | 28440          | 258           |                 |                |
| <i>rps12(2)</i>                    | 69645        | 139557     | 114          | 69541          | 258           |                 |                |
| <i>petB</i>                        | 74889        | 76332      | 6            | 787            | 651           |                 |                |
| <i>petD</i>                        | 76583        | 77801      | 9            | 685            | 525           |                 |                |
| <i>rpl16</i>                       | 81375        | 82707      | 411          | 913            | 9             |                 |                |
| <i>rpl2(1)</i>                     | 84588        | 86010      | 432          | 664            | 327           |                 |                |
| <i>rpl2(2)</i>                     | 151746       | 153168     | 327          | 664            | 432           |                 |                |
| <i>ndhB(1)</i>                     | 95126        | 97357      | 756          | 699            | 777           |                 |                |
| <i>ndhB(2)</i>                     | 140399       | 142630     | 777          | 699            | 756           |                 |                |
| <i>trnI-GAU(1)</i>                 | 102390       | 103403     | 42           | 937            | 35            |                 |                |
| <i>trnI-GAU(2)</i>                 | 134353       | 135366     | 35           | 937            | 42            |                 |                |
| <i>trnA-UGC(1)</i>                 | 103468       | 104346     | 38           | 806            | 35            |                 |                |
| <i>trnA-UGC(2)</i>                 | 133410       | 134288     | 35           | 806            | 38            |                 |                |
| <i>ndhA</i>                        | 119036       | 121198     | 540          | 1071           | 552           |                 |                |
| <i>ycf3</i>                        | 41702        | 43693      | 153          | 756            | 228           | 726             | 129            |
| <i>clpP</i>                        | 69885        | 71971      | 252          | 665            | 294           | 807             | 69             |

| <i>Eremurus luteus</i>    |        |        |       |         |        |          |         |
|---------------------------|--------|--------|-------|---------|--------|----------|---------|
| Gene                      | Start  | End    | ExonI | IntronI | ExonII | IntronII | ExonIII |
| <i>trnK-UUU</i>           | 1369   | 4054   | 35    | 2614    | 37     |          |         |
| <i>rps16</i>              | 4486   | 5617   | 207   | 886     | 39     |          |         |
| <i>trnG-UCC</i>           | 8755   | 9543   | 23    | 687     | 49     |          |         |
| <i>atpF</i>               | 11455  | 12807  | 408   | 786     | 159    |          |         |
| <i>rpoC1</i>              | 20315  | 23113  | 1626  | 738     | 435    |          |         |
| <i>trnL-UAA</i>           | 46816  | 47403  | 37    | 501     | 50     |          |         |
| <i>trnV-UAC</i>           | 51657  | 52322  | 37    | 590     | 39     |          |         |
| <i>rps12(1)</i>           | 70141  | 99062  | 114   | 28550   | 258    |          |         |
| <i>rps12(2)</i>           | 70141  | 141101 | 114   | 70589   | 258    |          |         |
| <i>petB</i>               | 75384  | 76832  | 6     | 792     | 651    |          |         |
| <i>petD</i>               | 77077  | 78301  | 9     | 691     | 525    |          |         |
| <i>rpl16</i>              | 81873  | 83209  | 411   | 917     | 9      |          |         |
| <i>rpl2(1)</i>            | 85089  | 86511  | 432   | 664     | 327    |          |         |
| <i>rpl2(2)</i>            | 153395 | 154817 | 327   | 664     | 432    |          |         |
| <i>ndhB(1)</i>            | 95732  | 97963  | 756   | 699     | 777    |          |         |
| <i>ndhB(2)</i>            | 141943 | 144174 | 777   | 699     | 756    |          |         |
| <i>trnI-GAU(1)</i>        | 102986 | 103999 | 42    | 937     | 35     |          |         |
| <i>trnI-GAU(2)</i>        | 135907 | 136920 | 35    | 937     | 42     |          |         |
| <i>trnA-UGC(1)</i>        | 104064 | 104942 | 38    | 806     | 35     |          |         |
| <i>trnA-UGC(2)</i>        | 104064 | 135842 | 35    | 806     | 38     |          |         |
| <i>ndhA</i>               | 120628 | 122782 | 540   | 1063    | 552    |          |         |
| <i>ycf3</i>               | 41942  | 43935  | 153   | 756     | 228    | 728      | 129     |
| <i>clpP</i>               | 70381  | 72462  | 252   | 660     | 294    | 807      | 69      |
| <i>Eremurus suworowii</i> |        |        |       |         |        |          |         |
| Gene                      | Start  | End    | ExonI | IntronI | ExonII | IntronII | ExonIII |
| <i>trnK-UUU</i>           | 1368   | 4052   | 35    | 2613    | 37     |          |         |
| <i>rps16</i>              | 4484   | 5620   | 207   | 891     | 39     |          |         |
| <i>trnG-UCC</i>           | 8819   | 9577   | 23    | 687     | 49     |          |         |
| <i>atpF</i>               | 11485  | 12848  | 408   | 797     | 159    |          |         |
| <i>rpoC1</i>              | 20361  | 23157  | 1626  | 736     | 435    |          |         |
| <i>trnL-UAA</i>           | 46752  | 47341  | 37    | 503     | 50     |          |         |
| <i>trnV-UAC</i>           | 51615  | 52280  | 37    | 590     | 39     |          |         |
| <i>rps12(1)</i>           | 70068  | 98994  | 114   | 28555   | 258    |          |         |
| <i>rps12(2)</i>           | 70068  | 141090 | 114   | 70651   | 258    |          |         |
| <i>petB</i>               | 75310  | 76757  | 6     | 791     | 651    |          |         |
| <i>petD</i>               | 77003  | 78221  | 9     | 685     | 525    |          |         |
| <i>rpl16</i>              | 81787  | 83124  | 411   | 918     | 9      |          |         |
| <i>rpl2(1)</i>            | 85021  | 86443  | 432   | 664     | 327    |          |         |
| <i>rpl2(2)</i>            | 153384 | 154806 | 327   | 664     | 432    |          |         |

|                    |        |        |     |      |     |     |     |
|--------------------|--------|--------|-----|------|-----|-----|-----|
| <i>ndhB(1)</i>     | 95664  | 97895  | 756 | 699  | 777 |     |     |
| <i>ndhB(2)</i>     | 141932 | 144163 | 777 | 699  | 756 |     |     |
| <i>trnI-GAU(1)</i> | 102920 | 103933 | 42  | 937  | 35  |     |     |
| <i>trnI-GAU(2)</i> | 135894 | 136907 | 35  | 937  | 42  |     |     |
| <i>trnA-UGC(1)</i> | 103998 | 104876 | 38  | 806  | 35  |     |     |
| <i>trnA-UGC(2)</i> | 134951 | 135829 | 35  | 806  | 38  |     |     |
| <i>ndhA</i>        | 120607 | 122756 | 540 | 1058 | 552 |     |     |
| <i>ycf3</i>        | 41988  | 43982  | 153 | 756  | 228 | 729 | 129 |
| <i>clpP</i>        | 70308  | 72390  | 252 | 661  | 294 | 807 | 69  |
